# Supplementary material for: A Family-Based Study of Inherited Genetic Risk in Lipedema
Source: PubMed Central journal article supplement (PMC11044871; doi:10.1089/lrb.2023.0065), 2024-04-17
Supplement: Suppl_TableS1.pdf [file Suppl_TableS1.pdf]

**Supplementary Table S1. Participant lipedema status.**

| Family | Individual | Sex | Lipedema Diagnosis | Lipedema Age of Onset (years) |
|--------|------------|-----|--------------------|-------------------------------|
| 1      | 1          | M   | N                  |                               |
|        | 2          | F   | N                  |                               |
|        | 3          | F   | Y                  | 14                            |
|        | 4          | F   | Y                  | 14                            |
| 2      | 1          | F   | N                  |                               |
|        | 2          | F   | Y                  | 14                            |
|        | 3          | M   | N                  |                               |
|        | 4          | F   | N                  |                               |
|        | 5          | M   | N                  |                               |
|        | 6          | M   | N                  |                               |
| 3      | 1          | M   | N                  |                               |
|        | 2          | F   | N                  |                               |
|        | 3          | F   | Y                  | 37                            |
| 4      | 1          | M   | N                  |                               |
|        | 2          | F   | N                  |                               |
|        | 3          | F   | Y                  | 16                            |
| 5      | 1          | M   | N                  |                               |
|        | 2          | F   | Y                  | 13                            |
|        | 3          | F   | N                  |                               |
| 6      | 1          | F   | Y                  | 15                            |
|        | 2          | F   | N                  |                               |
|        | 3          | M   | N                  |                               |
| 7      | 1          | F   | N                  |                               |
|        | 2          | F   | Y                  | 13-19                         |
|        | 3          | F   | N                  |                               |
| 8      | 1          | F   | Y                  | 50                            |
|        | 2          | F   | N                  |                               |
|        | 3          | F   | Uncertain          |                               |
| 9      | 1          | F   | N                  |                               |
|        | 2          | F   | N                  |                               |
|        | 3          |     | Y                  | 15-16                         |

Affected individuals are shaded in gray. Age of onset is a best estimate; some probands became aware of the condition in later life.
